# Supplementary material for: The resident pathobiont Staphylococcus xylosus in Nfkbiz-deficient skin accelerates spontaneous skin inflammation
Source: PubMed Central journal article supplement (PMC5524713; doi:10.1038/s41598-017-05740-z), 2017-07-24
Supplement: 41598_2017_5740_MOESM1_ESM.pdf [file 41598_2017_5740_MOESM1_ESM.pdf]

# The resident pathobiont *Staphylococcus xylosum* in *Nfkbiz*-deficient skin accelerates spontaneous skin inflammation

Yeji Kim<sup>1</sup>, Yong-Soo Lee<sup>1</sup>, Jin-Young Yang<sup>1</sup>, Su-Hyun Lee<sup>1</sup>, Yun-Yong Park<sup>2</sup>,  
and Mi-Na Kweon<sup>1\*</sup>

<sup>1</sup>*Mucosal Immunology Laboratory, Department of Convergence Medicine,  
University of Ulsan College of Medicine/Asan Medical Center, Seoul, Republic  
of Korea*

<sup>2</sup>*ASAN Institute for Life Science, Asan Medical Center, Seoul, Republic of Korea*

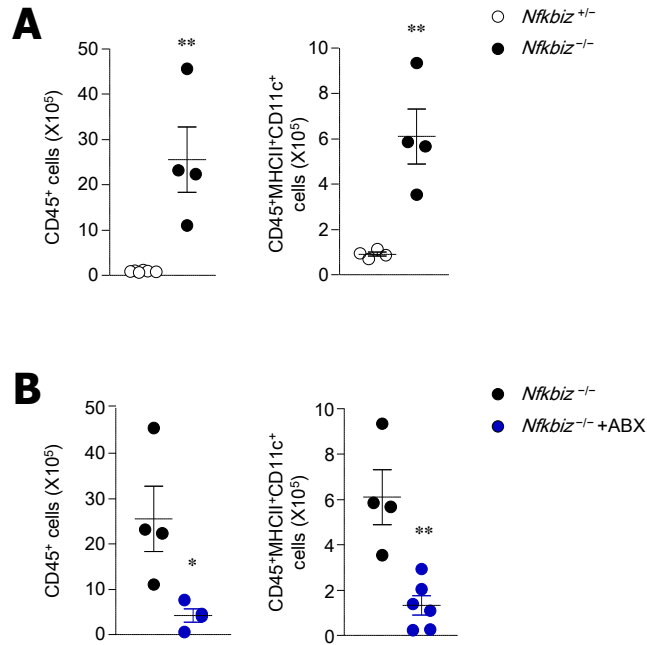

**Fig E1. Accumulation of immune cells in skin of *Nfkbiz*<sup>-/-</sup> mice with dermatitis is reduced by ABX treatment. (A)** FACS analysis of CD45<sup>+</sup> cells and CD45<sup>+</sup>MHCII<sup>+</sup>CD11c<sup>+</sup> cells in the skin of *Nfkbiz*<sup>+/-</sup> and *Nfkbiz*<sup>-/-</sup> mice. **(B)** FACS analysis of CD45<sup>+</sup> cells and CD45<sup>+</sup>MHCII<sup>+</sup>CD11c<sup>+</sup> cells in the skin of untreated and ABX-treated *Nfkbiz*<sup>-/-</sup> mice. Data are representative of three independent experiments. \**p* < 0.05, \*\**p* < 0.01.

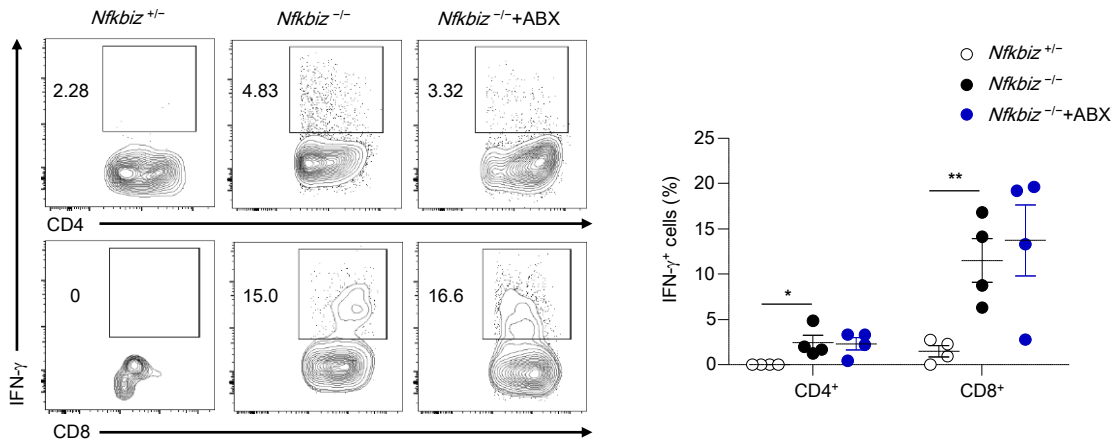

**Fig E2. The level of IFN- $\gamma$  in the skin of *Nfkbiz*<sup>-/-</sup> mice remains unchanged after ABX treatments.** FACS analysis of IFN- $\gamma$  production by CD4<sup>+</sup> and CD8<sup>+</sup> cells in the skin of *Nfkbiz*<sup>+/-</sup>, untreated, and ABX-treated *Nfkbiz*<sup>-/-</sup> mice. Data are representative of three independent experiments. \* $p < 0.05$ , \*\* $p < 0.01$ .

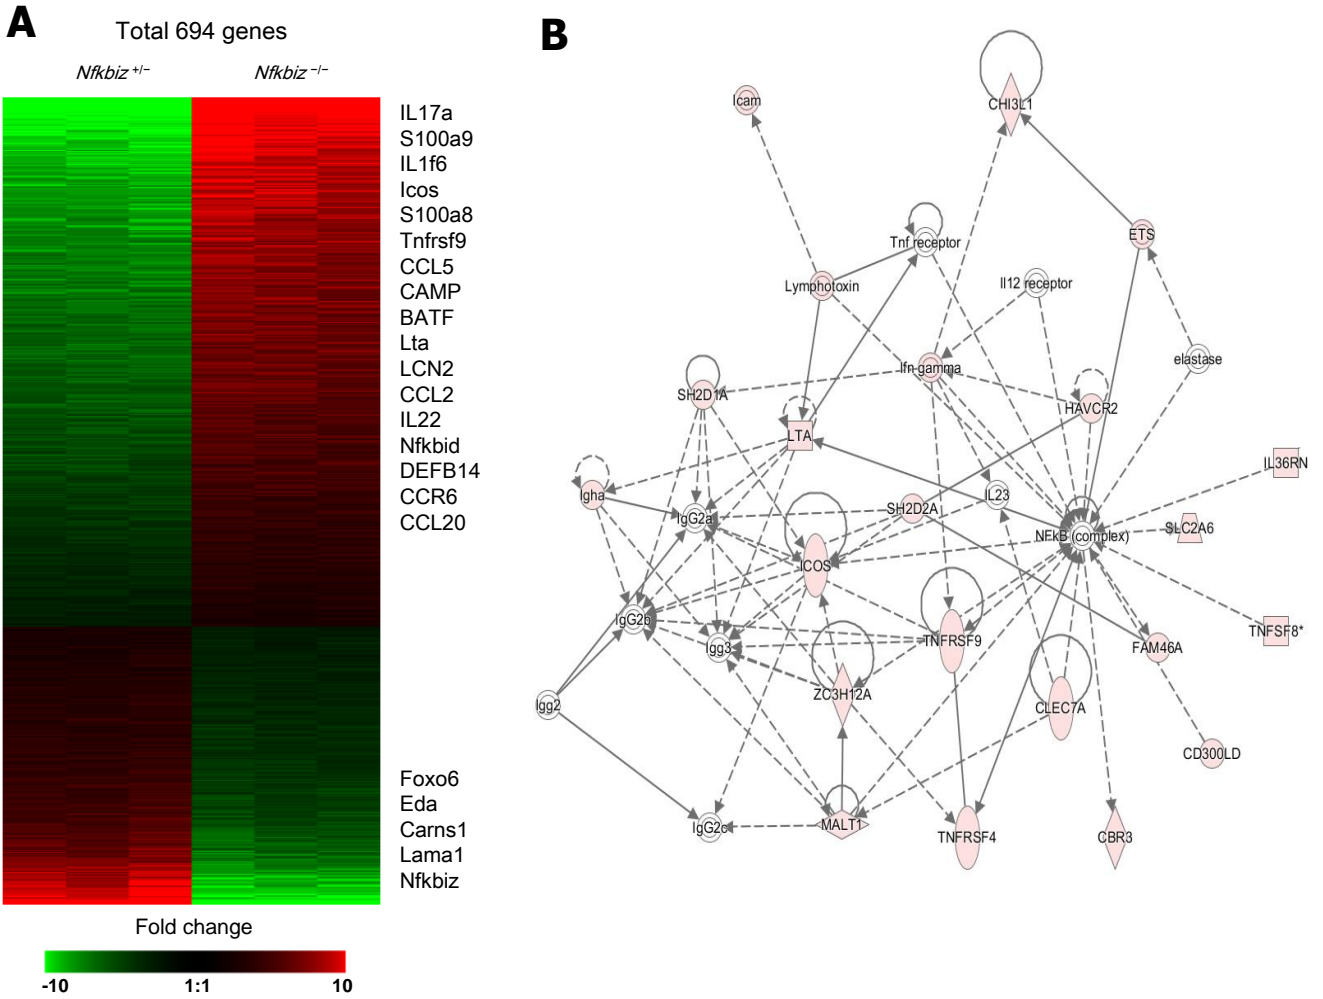

**Fig E3. Gene expression related to inflammation is upregulated in the skin of *Nfkbiz*<sup>-/-</sup> mice.** (A) Microarray analysis of the skin from *Nfkbiz*<sup>+/-</sup> and *Nfkbiz*<sup>-/-</sup> mice (n = 3 per group). Genes exhibiting significant change in expression (fold change > 1.0 and *p* < 0.05) between *Nfkbiz*<sup>+/-</sup> and *Nfkbiz*<sup>-/-</sup> mice were clustered in a heatmap. (B) A gene interaction network, associated with spontaneous dermatitis in *Nfkbiz*<sup>-/-</sup> mice, was established using Ingenuity Pathway Analysis (IPA) software. Solid lines indicate direct interaction, while dashed lines indicate indirect interaction.

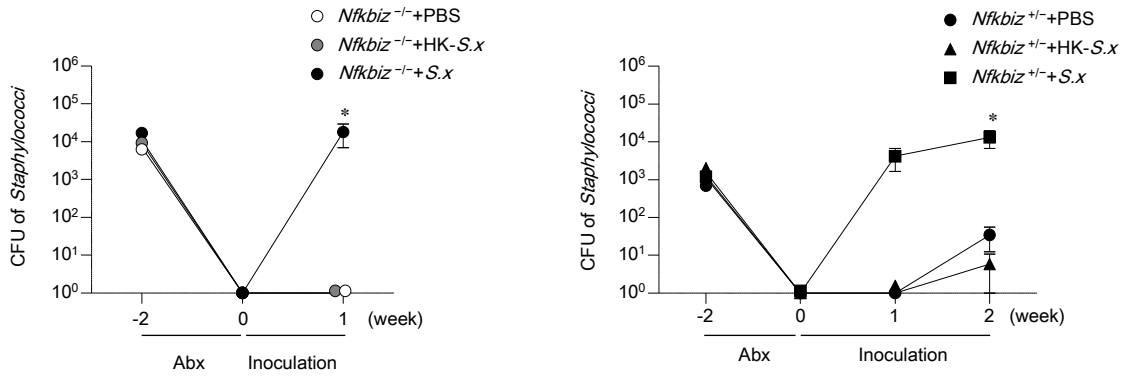

**Fig E4. Colonization pattern of *S. xylosus* after its topical application is shown.** CFUs of *Staphylococcus* species of skin swabs from *Nfkbiz*<sup>-/-</sup> and *Nfkbiz*<sup>+/-</sup> mice upon the inoculation of PBS, heat-killed *S. xylosus* (HK-*S.x*), and *S. xylosus* (*S.x*). Data are mean ± s.e.m. Data are representative of two independent experiments. \**p* < 0.05, \*\**p* < 0.01.

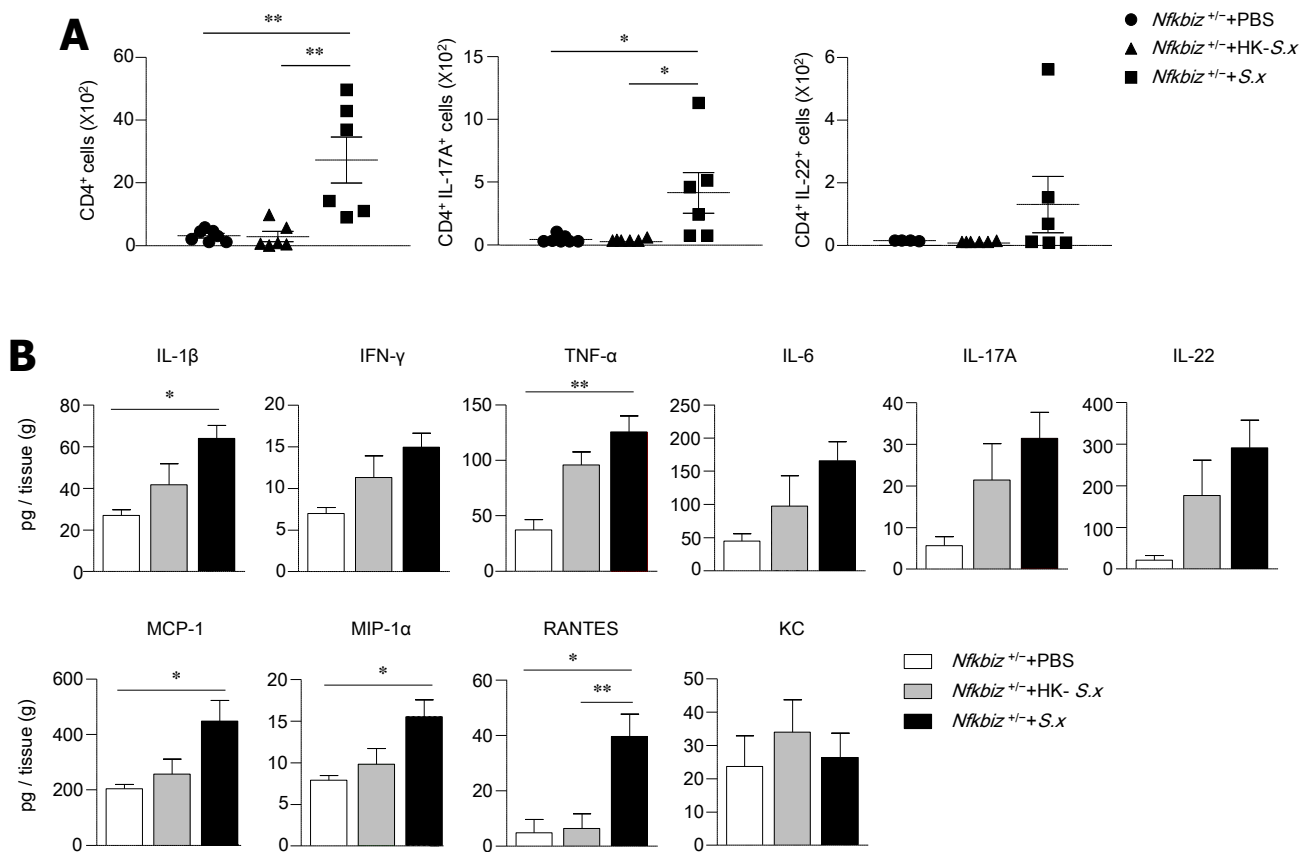

**Fig E5. Inoculation of *S. xyloso* triggered the differentiation of Th17 cells and the production of cytokines and chemokines in *Nfkbiz*<sup>+/-</sup> mice.** (A) FACS analysis of the IL-17A production by CD4<sup>+</sup> cells in the skin of *Nfkbiz*<sup>+/-</sup> mice with the inoculation of PBS, heat-killed *S. xyloso* (HK-*S.x*), and *S. xyloso* (*S.x*). (B) Cytokine and chemokine levels in skin homogenate from *Nfkbiz*<sup>+/-</sup> mice with the inoculation of PBS, HK-*S.x*, and *S.x*. Data are mean  $\pm$  s.e.m. Data are representative of three independent experiments. \* $p < 0.05$ , \*\* $p < 0.01$ .

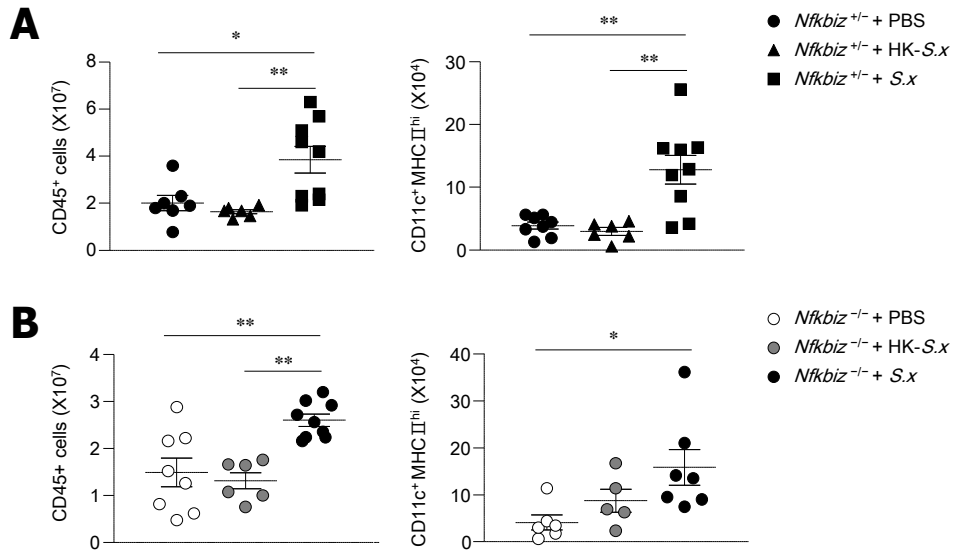

**Fig E6.** Cells in skin draining lymph nodes (sdLNs) from *Nfkbiz*<sup>-/-</sup> and *Nfkbiz*<sup>+/-</sup> mice were increased after the inoculation of *S. xylosum*. **(A)** FACS analysis of CD45<sup>+</sup> cells and CD45<sup>+</sup>MHCII<sup>+</sup>CD11c<sup>+</sup> cells in sdLNs from *Nfkbiz*<sup>+/-</sup> mice with the inoculation of PBS, HK-*S.x*, and *S.x*. **(B)** CD45<sup>+</sup> cells and CD45<sup>+</sup>MHCII<sup>+</sup>CD11c<sup>+</sup> cells in sdLNs from *Nfkbiz*<sup>-/-</sup> mice with the inoculation of PBS, HK-*S.x*, and *S.x*. Data are representative of three independent experiments. \**p* < 0.05, \*\**p* < 0.01.
